## **Attention Deficit Hyperactivity Disorder Symptoms and Brain Morphology:**

### **Examining Confounding Bias**

Lorenza Dall'Aglio<sup>1,2\*</sup>; Hannah H. Kim<sup>3\*</sup>; Sander Lamballais<sup>4\*</sup>; Jeremy Labrecque<sup>5</sup>; Ryan L. Muetzel<sup>1†</sup>; Henning Tiemeier<sup>1,3†</sup>

<sup>1</sup>Department of Child and Adolescent Psychiatry, Erasmus MC University Medical Center Rotterdam-Sophia Children's Hospital, Rotterdam, the Netherlands

<sup>2</sup>The Generation R Study Group, Erasmus MC University Medical Center Rotterdam, Rotterdam, the Netherlands

<sup>3</sup>Department of Social and Behavioral Sciences, Harvard T.H. Chan School of Public Health, Boston, USA

<sup>4</sup>Department of Clinical Genetics, Erasmus MC University Medical Center Rotterdam, Rotterdam, the Netherlands

<sup>5</sup>Department of Epidemiology, Erasmus MC University Medical Center Rotterdam, Rotterdam, the Netherlands

\*Co-first author

†Co-last author

**Corresponding author:** Henning Tiemeier, MD Ph.D.; Department of Social and Behavioral Sciences, Harvard T.H. Chan School of Public Health, 677 Huntington Ave, Boston, 02115 MA, USA; [tiemeier@hsph.harvard.edu](mailto:tiemeier@hsph.harvard.edu)

## **ABSTRACT (199/200 words)**

**Background:** Associations between attention-deficit/hyperactivity disorder (ADHD) and brain morphology have been reported, although with several inconsistencies. These may partly stem from confounding bias, which could distort associations and limit generalizability. We examined how associations between brain morphology and ADHD symptoms change with adjustments for potential confounders typically overlooked in the literature (aim 1), and for IQ, which is typically corrected for but plays an unclear role (aim 2).

**Methods:** Participants were 10-year-old children from the Adolescent Brain Cognitive Development ( $N=7,961$ ) and Generation R ( $N=2,531$ ) studies. Cortical area and volume were measured with MRI and ADHD symptoms with the Child Behavior Checklist. Surface-based cross-sectional analyses were run.

**Results:** ADHD symptoms related to widespread cortical regions when solely adjusting for demographic factors. Additional adjustments for socioeconomic and maternal behavioral confounders (aim 1) generally attenuated associations, as cluster sizes halved and effect sizes substantially reduced. Cluster sizes were further reduced when including IQ (aim 2), however, we argue that adjustments could have introduced bias (e.g., by conditioning on a collider).

**Conclusions:** Careful confounder selection and control can help identify more robust and specific regions of associations for ADHD symptoms, across two cohorts. We provided guidance to minimizing confounding bias in psychiatric neuroimaging.

**Funding:** Authors are supported by an NWO-VICI grant (NWO-ZonMW: 016.VICI.170.200 to HT) for HT, LDA, SL, and the Sophia Foundation S18-20, and Erasmus University and Erasmus MC Fellowship for RLM.

## 1 **Introduction**

2 Large strides have been made in the identification of neuroanatomical correlates of  
3 psychiatric problems, with Attention-Deficit/Hyperactivity Disorder (ADHD) being a prominent  
4 example. ADHD is the most prevalent neurodevelopmental disorder in children worldwide  
5 and is characterized by atypical levels of inattention, hyperactivity, and/or impulsivity (1).  
6 Structural Magnetic Resonance Imaging (sMRI) studies have highlighted that children with  
7 ADHD show widespread morphological differences, such as in the basal ganglia (2),  
8 subcortical areas (3), and frontal, cingulate, and temporal cortices compared to children  
9 without the disorder (4,5).

10 Consistently identifying the neuroanatomical substrate of ADHD, however, remains  
11 challenging. A recent meta-analysis did not find convergence across the literature on brain  
12 differences in children and adolescents with ADHD (6). One possible explanation for this  
13 inconsistency is the multifaceted nature of ADHD, in which children with the disorder have  
14 heterogeneous presentations on several cognitive and emotional domains, which could stem  
15 from distinct brain structural substrates. Other explanations regard study design. If  
16 suboptimal, it may lead to biased estimates and lack of generalizability, thus potentially  
17 concealing robust and replicable relations of brain morphology with ADHD. The present  
18 study focuses on confounding, a common source of bias in etiological studies.

19 Confounding bias arises when a third variable affects both the determinant  
20 (independent variable) and outcome (dependent variable) of interest (i.e., is a common  
21 cause) (7). Confounding leads to over- or under-estimation of the true effect between  
22 determinant and outcome and can even change the direction of an association. To minimize  
23 confounding bias, appropriate confounder control is paramount, although it is challenging,  
24 especially in observational studies like most neuroimaging studies of ADHD. Previous  
25 literature and expert knowledge can guide the identification of potential confounders (8),  
26 which can then be appropriately adjusted for in regression models or using methods such as  
27 restriction, standardization, or propensity scores.

28           Within neuroimaging studies of ADHD, except for a few large investigations (3,9,10),  
29 studies have generally matched or adjusted for a few demographic variables (e.g., age, sex)  
30 and neuroimaging metrics or parameters. Of the 19 studies included in a systematic review  
31 of neuroimaging studies on ADHD (11), 17 adjusted or matched for age in their analyses, 14  
32 for sex, 9 for precision variables like study site, and 8 for the intelligence quotient (IQ)  
33 (**Supplementary Table 1**). Further potential confounders should, however, be considered.  
34 For instance, socioeconomic status (SES) is related to both higher risk for ADHD and  
35 variation in cortical brain structure (12,13). Thus, it is likely a confounder. Lack of adjustment  
36 for SES may have therefore concealed key relations between ADHD and brain structure.  
37 Adjustment choices are dependent on the availability of large samples with data on a wide  
38 variety of covariates, which has to date been limited for psychiatric neuroimaging studies.  
39 Yet, this is rapidly changing with the advent of population neuroscience, which entails large-  
40 scale studies with neurobiological data. This lends new opportunities for further confounder  
41 adjustments to be considered in neuroimaging studies of ADHD. Conversely, previous  
42 studies have adjusted for IQ, which may not be a confounder in the association between  
43 ADHD symptoms and the brain, and may thus have led to further bias in the results (14).

44           In this study, we examined the association between brain structure and ADHD  
45 symptoms and how the selection and control for potential confounders may affect results  
46 (aim 1). Moreover, we discussed the unclear role of IQ in brain structure – ADHD  
47 associations and the potential consequences of adjusting for it (aim 2). We leveraged two  
48 large, population-based cohorts: the Adolescent Brain Cognitive Development (ABCD) and  
49 the Generation R Studies. In line with most neuroimaging studies, we adopted a cross-  
50 sectional design.

51

52 **Results**

53 **Associations between ADHD symptoms and brain morphology are widespread**

54 We analyzed data from 10-year-old children from the ABCD ( $N = 7,961$ , multi-site)  
55 and Generation R ( $N = 2,531$ , single-site) Studies (**Supplementary Table 2**). ADHD  
56 symptoms were measured with the Child Behavioral Checklist (CBCL).  $T_1$ -weighted images  
57 were obtained with 3T scanners (15,16). Cortical surface area and volume were considered,  
58 while thickness was not tested due to previously reported null findings in the Generation R  
59 Study (4). We ran vertex-wise linear regression models for ADHD with cortical surface area  
60 and volume. We adjusted for demographic and study characteristics which have been  
61 generally considered by previous literature (**Supplementary Table 1**): age, sex, ethnicity,  
62 and study site (ABCD only). We refer to this model as model 1, as further adjustments for  
63 confounders are outlined in subsequent steps.

64 We found that higher ADHD symptoms were associated with less bilateral surface  
65 area and cortical volume in both cohorts. As shown in **Figure 1**, associations were  
66 widespread for both surface area (ABCD =  $1,109.8 \text{ cm}^2$ ; GenR =  $444.7 \text{ cm}^2$ ) and volume  
67 (ABCD =  $666.0 \text{ cm}^2$ ; GenR =  $96.1 \text{ cm}^2$ ). Across both cohorts, we consistently identified  
68 clusters for surface area in the lateral occipital, postcentral, rostral middle and superior  
69 frontal, and superior parietal cortices. For volume, we observed overlap across cohorts in the  
70 cuneus, precuneus, fusiform, inferior parietal, inferior, middle, and superior temporal,  
71 isthmus of the cingulate, lateral occipital, pericalcarine, pre- and post-central, and  
72 supramarginal cortices.

73

74 **Figure 1.** Significant clusters in the association of ADHD symptoms with cortical surface  
75 area (top) and volume (bottom) based on the ABCD and Generation R Studies, for model 1.

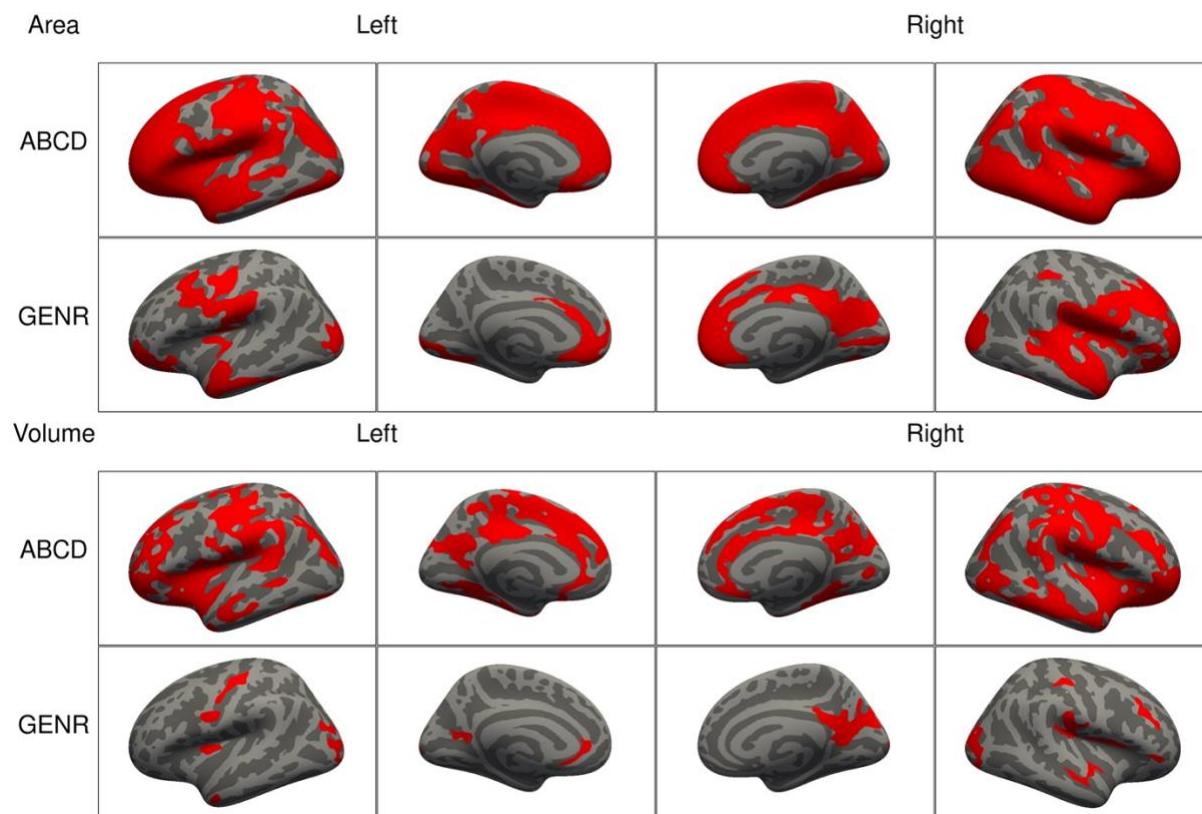

76  
77 *Note.* Rows represent the results for the ABCD or Generation R Studies, and the columns represent the left and right  
78 hemispheres. Regions in red represent significant clusters from model 1 (adjusted for sex, age, race/ethnicity).

79 **Confounder selection: Socioeconomic and maternal behavioral factors**

80 Next, we considered factors that have been previously linked to ADHD and brain  
81 structure in the literature, and are thus potential confounders. To illustrate this background  
82 knowledge and the assumptions about relations between variables, we used Directed  
83 Acyclic Graphs (DAGs), a type of causal diagram (8). These guide the identification (and  
84 dismissal) of covariates that may act as confounders (**Supplementary Box 1**). Of note,  
85 while assumptions may not hold, this theoretical approach is preferred to methods selecting  
86 confounders based on model statistics (17). The DAGs are depicted in **Figure 2** and  
87 **Supplementary Figure 1**, and the rationales for variable inclusion are explained below and  
88 in the *Methods* section.

89 Based on the literature, lower SES is associated with a higher risk for ADHD (12) and  
90 with variation in cortical brain structure (13). Thus, confounding by socioeconomic factors in  
91 the relation between ADHD and brain morphology is likely. We therefore additionally  
92 adjusted for a second set of confounders (model 2) related to SES: household income,  
93 maternal education, and maternal age at childbirth.

94 Moreover, several factors concerning maternal behavior, pre- and postnatally, have  
95 been associated with both ADHD and brain morphology. For instance, prenatal exposure to  
96 substances is known to increase the risk of developing ADHD symptoms and has been  
97 associated with variation in cerebral volume and surface area (18,19). Postnatal maternal  
98 psychopathology has been linked to higher child ADHD symptoms (20) and smaller brain  
99 volume in children (21). Thus, in model 3 we additionally adjusted for prenatal exposure to  
100 substance use (tobacco and cannabis), and postnatal maternal psychopathology.

101 **Figure 2.** Directed Acyclic Graphs for brain structure and ADHD symptoms (simplified).

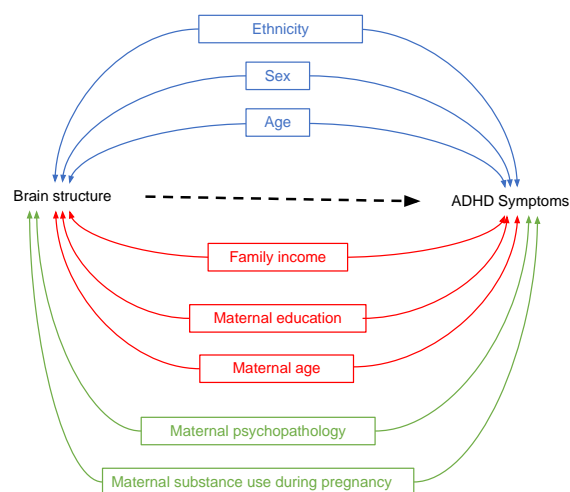

102

103 *Note.* DAGs illustrating potential confounders in the association between brain structure and ADHD symptoms for three  
104 *sequential* models. Model 1 included demographic and study characteristics: Sex, age, ethnicity, study site (ABCD only) (in  
105 blue). Model 2 additionally included socioeconomic status factors: Family income, maternal education, and maternal age at  
106 childbirth (in red). Model 3 additionally incorporated postnatal maternal psychopathology and maternal substance use during  
107 pregnancy (in green).



108 **Adjusting for additional confounders led to reductions in the clusters of association**

109 Adjustments for SES (model 2) led to reductions in the spatial extent of the clusters  
110 for surface area and volume in both cohorts (**Figure 3**). For surface area, cluster sizes for  
111 ADHD symptoms reduced from 1,109.8 cm<sup>2</sup> in model 1 to 885.4 cm<sup>2</sup> in model 2 (= - 20%) in  
112 the ABCD Study, and from 444.7 cm<sup>2</sup> to 226.0 cm<sup>2</sup> (= - 49%) in the Generation R Study. In  
113 the analyses of volume, clusters for ADHD symptoms were reduced from 666.0 cm<sup>2</sup> in model  
114 1 to 384.6 cm<sup>2</sup> in model 2 (= - 42%) in the ABCD Study, and from 96.1 cm<sup>2</sup> to 31.6 cm<sup>2</sup> (= -  
115 67%) in the Generation R Study. Adjustments for maternal substance use and  
116 psychopathology (model 3) showed further cluster changes for surface area and volume in  
117 both cohorts (**Figure 3**). For surface area, clusters covered 682.6 cm<sup>2</sup> in the ABCD study (= -  
118 23%, compared to model 2) and 214.1 cm<sup>2</sup> (= - 5%) in the Generation R Study. Cortical  
119 volume clusters related to ADHD symptoms comprised 262.5 cm<sup>2</sup> (= - 32%, compared to  
120 model 2) in the ABCD Study, and 33.8 cm<sup>2</sup> (= + 7%) in the Generation R Study.

121 After adjusting for the confounders added in model 3, across both cohorts, we  
122 consistently identified clusters for surface area in the cuneus, precuneus, fusiform, inferior  
123 parietal, isthmus of the cingulate, pericalcarine, pre- and post-central, rostral middle and  
124 superior frontal, superior temporal and supramarginal cortices. Clusters consistently  
125 identified across cohorts for volume were in the inferior parietal, isthmus of the cingulate,  
126 later occipital, pre- and post-central, precuneus, and supramarginal cortices.

127 **Figure 3.** Significant clusters in the association of ADHD symptoms with cortical surface  
128 area (top) and volume (bottom) based on the ABCD and Generation R Studies, for models 1  
129 to 3.

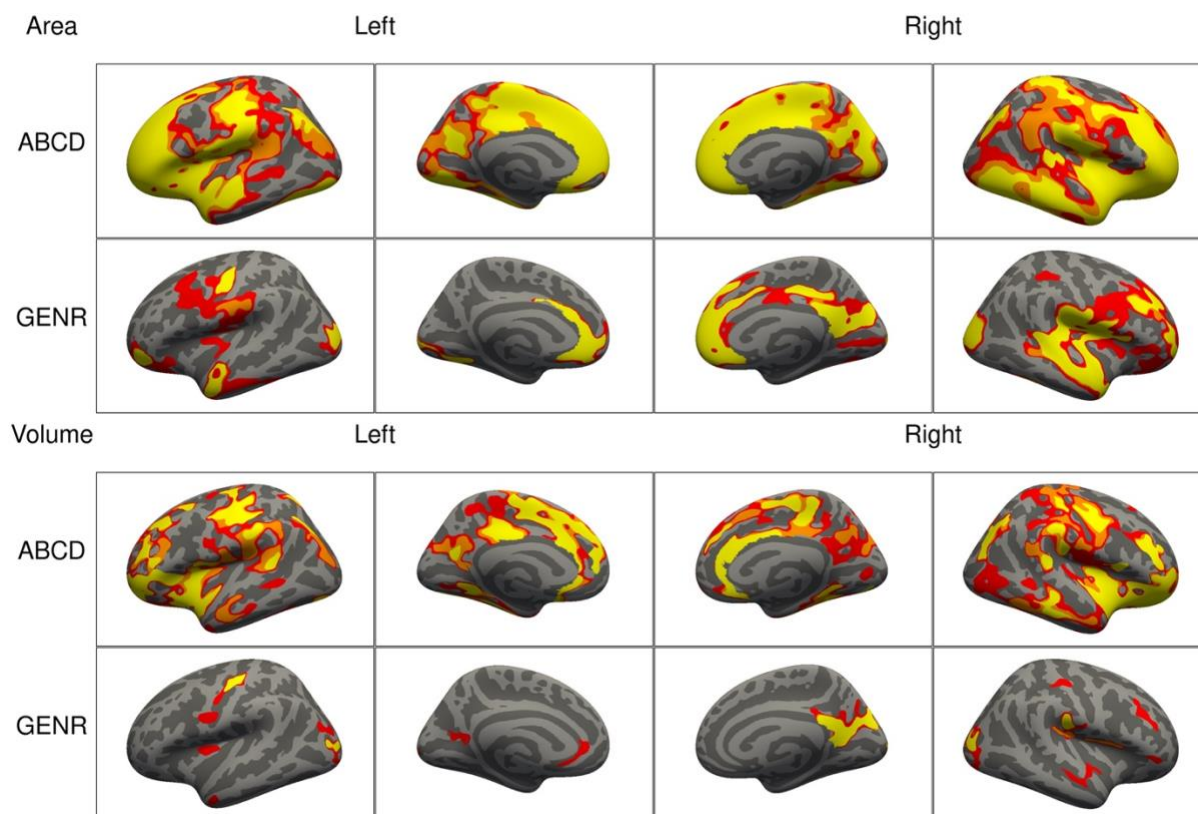

130

131 *Note.* Rows represent the results for the ABCD or Generation R Studies, and the columns represent the left and right  
132 hemispheres. The colors denote the different models. Regions in red represent significant clusters from model 1 (sex, age,  
133 race/ethnicity), orange from model 2 (model 1 + family income, maternal education, and maternal age at childbirth), and yellow  
134 from model 3 (model 2 + maternal smoking, substance use during pregnancy, psychopathology).

135 **Similar results were observed for ADHD diagnosis**

136 To explore whether the results observed for associations between brain morphology and  
137 ADHD symptoms applied to children with an ADHD diagnosis, we repeated the primary  
138 analysis using the ADHD diagnostic data from the Kiddie Schedule for Affective Disorders  
139 and Schizophrenia (KSADS) in the ABCD Study. In line with our primary results, ADHD  
140 diagnosis was associated with less bilateral surface area and volume. Compared to clusters  
141 for ADHD symptoms, those associated with ADHD diagnosis were smaller, but overlapping  
142 (**Supplementary Figure 2**). We observed similar patterns of reduction in the spatial extent  
143 of the clusters after adjusting for each set of confounders (**Supplementary Figure 3**). For  
144 surface area, cluster sizes for ADHD symptoms covered 275.5 cm<sup>2</sup> in model 1 and reduced  
145 to 233.0 cm<sup>2</sup> in model 2 (= - 15%), and 94.9 cm<sup>2</sup> in model 3 (= - 59%, compared to model 2).  
146 For volume, cluster sizes for ADHD symptoms comprised 98.9 cm<sup>2</sup> in model 1 and reduced  
147 to 70.7 cm<sup>2</sup> in model 2 (= - 29%), and 26.2 cm<sup>2</sup> in model 3 (= - 63%, compared to model 2).

148

149 **Beta coefficients generally decreased after confounder adjustments, but may also**  
150 **increase**

151 Surface-based studies generally focus on the spatial extent of cortical clusters  
152 associated with the phenotype, but, in this study, we also explored how confounding  
153 adjustments affected the vertex-wise regression coefficients for ADHD symptoms.

154 At a vertex-wise level, adjusting for socioeconomic and maternal factors (model 3)  
155 led to reductions in the beta coefficients, across the brain, for both cohorts (**Supplementary**  
156 **Figure 4**). Of note, some beta coefficients also showed increases.

157 As confounding bias may lead to under- or over-estimation, it is not surprising to observe  
158 both decreases and increases in the average beta coefficients after adjustments.

159 At an anatomical region level, where estimates of vertices within a given Desikan-  
160 Killiany region were averaged, beta coefficients for surface area tended to decrease from  
161 model 1 to 2 by approximately 15% (**Figure 4, Supplementary Figure 5**). Further  
162 adjustments from model 2 to 3 led to decreases in the average beta coefficients of certain

163 regions and increases in others. Similar patterns were found for volume across both studies  
164 **(Supplementary Figure 6, 7)**. The average beta coefficients per region correlated  
165 moderately to strongly between the ABCD and Generation R Studies for both surface area  
166 ( $r_{M1} = 0.83$ ,  $r_{M2} = 0.79$ ,  $r_{M3} = 0.77$ ) and volume ( $r_{M1} = 0.57$ ,  $r_{M2} = 0.56$ ,  $r_{M3} = 0.61$ )  
167 **(Supplementary Figure 8)**.

168 **Figure 4.** Region-based average regression coefficients for surface area in the ABCD and  
169 Generation R Studies.

**ABCD**

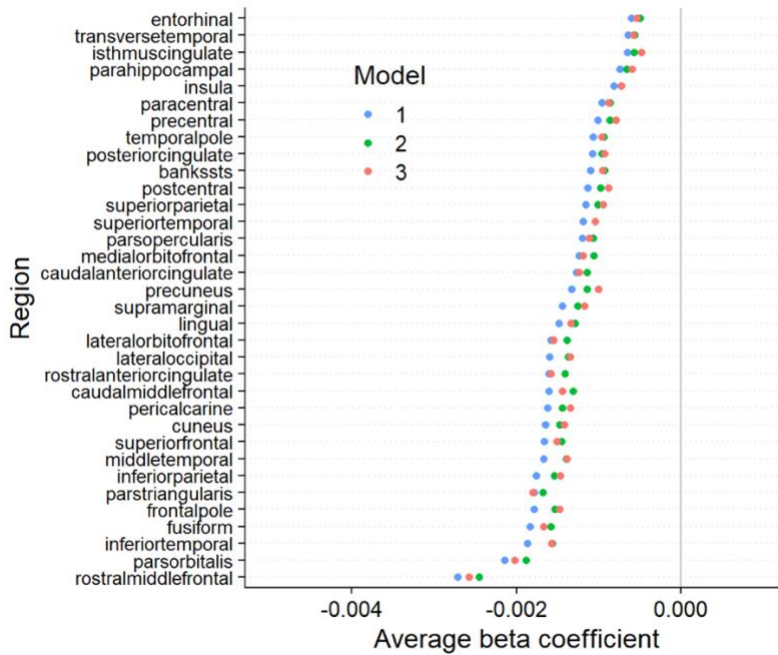

**GENR**

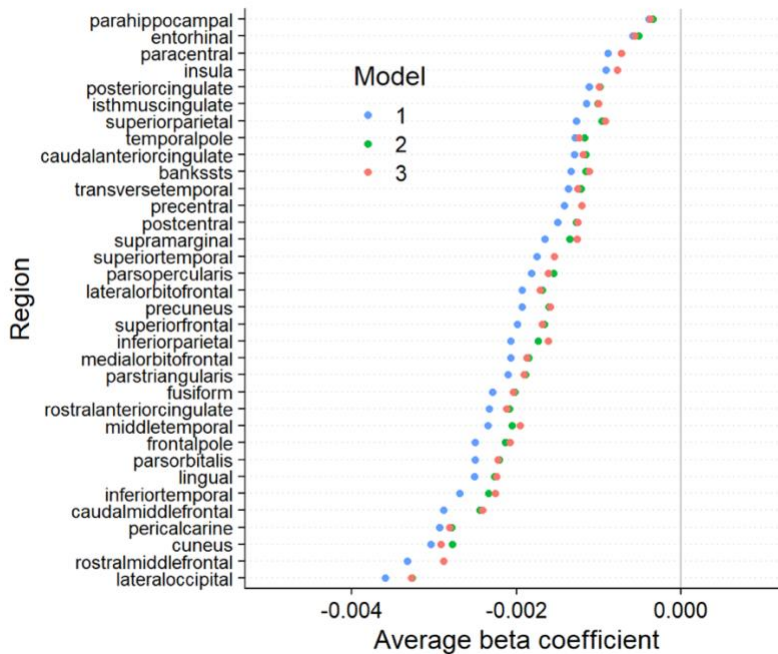

170  
171 *Note.* The colors denote the different models, and the circles denote the average of all the betas within that region. The regions  
172 are based on the Desikan-Killiany atlas. Results for the ABCD and Generation R Studies are respectively shown on the top and  
173 bottom.

174

175 **IQ may be a confounder, mediator, or collider in neuroanatomical studies of ADHD**

176 We considered one additional scenario which included IQ, a factor that is often  
177 adjusted for in previous studies (**Supplementary Table 1**). However, based on prior  
178 literature, it holds an ambiguous role in structural anatomy - ADHD relations. Previous  
179 studies found that children with ADHD scored lower on IQ than children without ADHD (22).  
180 Differential brain structure with levels of IQ has also been shown (23). However, the  
181 directions of causation between these variables remain unclear (24). IQ may therefore be a  
182 confounder, collider, and/or mediator in the relation between brain structure and ADHD, as  
183 depicted in the DAGs in **Figure 5** and **Supplementary Box 2**.

184 First, it could be argued that IQ is partly innate and precedes brain development and  
185 ADHD, making it a confounder (**Figure 5A**). Second, IQ may lie in the pathway between  
186 brain structure and ADHD and therefore act as a mediator (**Figure 5B**). It is conceivable that  
187 cognitive differences, as a consequence of subtle neurodevelopmental differences (25),  
188 could underlie ADHD. Adjusting for a mediator would lead to bias when estimating the total  
189 association between brain structure and ADHD (26). Third, brain structure may impact  
190 intelligence scores (25), and ADHD symptoms may affect IQ test performance (27) (**Figure**  
191 **5C**). A variable that is independently caused by the outcome and the determinant is also  
192 known as a collider, and adjusting for it leads to (collider) bias. Here, we explored the impact  
193 of adjusting for IQ when examining the relation between brain morphology and ADHD  
194 (model 4).

195 **Figure 5.** Directed acyclic graphs for IQ, brain structure, and ADHD symptoms

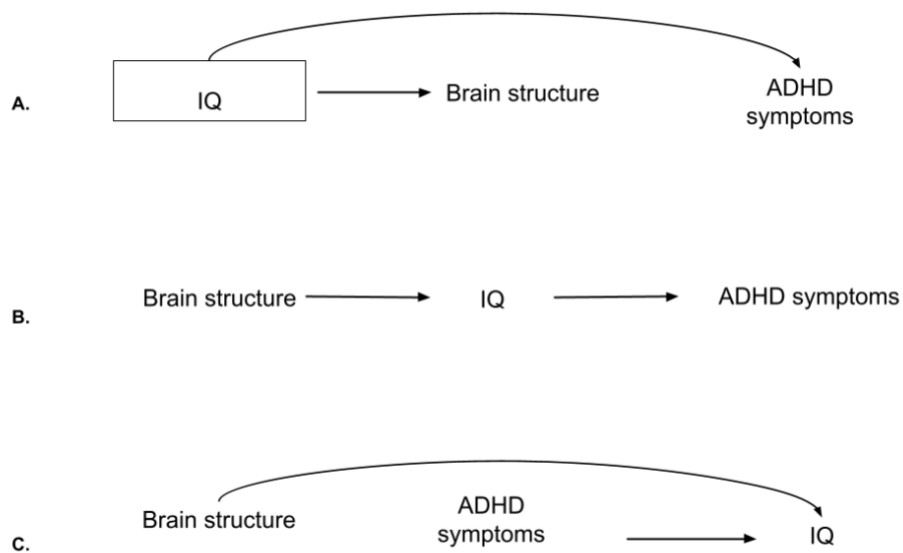

196

197 *Note.* **A)** DAG for IQ as a confounder. In this case, adjustments are needed as the backdoor path from brain structure to ADHD  
198 symptoms through IQ is open. By adjusting (box around IQ), the path gets closed. **B)** DAG for IQ as a mediator. Adjustments  
199 are not needed to estimate the total effect of brain structure on ADHD symptoms. **C)** DAG for IQ as a collider. The backdoor  
200 path through IQ is already closed. Adjustments would open the path and lead to collider bias.

201 **Adjustments for IQ led to further cluster reductions**

202           After additionally adjusting for IQ, the spatial extent of the clusters associated with  
203 ADHD symptoms reduced further in both cohorts (**Figure 6**). For surface area, compared to  
204 model 3, clusters reduced from 682.6 cm<sup>2</sup> to 525.7 cm<sup>2</sup> (= - 23%) for the ABCD Study, and  
205 from 214.1 cm<sup>2</sup> to 93.1 cm<sup>2</sup> for the Generation R Study (= - 57%). For volume, compared to  
206 model 3, clusters reduced from 262.5 cm<sup>2</sup> to 164.1 cm<sup>2</sup> (= - 37%) in the ABCD Study and  
207 from 33.8 cm<sup>2</sup> to 17.9 cm<sup>2</sup> (= - 47%) in the Generation R Study.

208           For both cohorts, clusters of association for surface area in model 4 were located in  
209 the fusiform, inferior parietal, insula, lateral occipital, middle temporal, pericalcarine, pre- and  
210 post-central, precuneus, rostral middle, and superior frontal, superior parietal and temporal,  
211 and supramarginal cortices. For volume, the remaining clusters consistently identified across  
212 cohorts were the isthmus of the cingulate, lateral occipital, pre- and post-central, lingual,  
213 precuneus, superior parietal, and supramarginal cortices.



214 **Figure 6.** Significant clusters in the association of ADHD symptoms with cortical surface  
215 area (top) and volume (bottom) based on the ABCD and Generation R Studies, after  
216 additional adjustment for IQ.

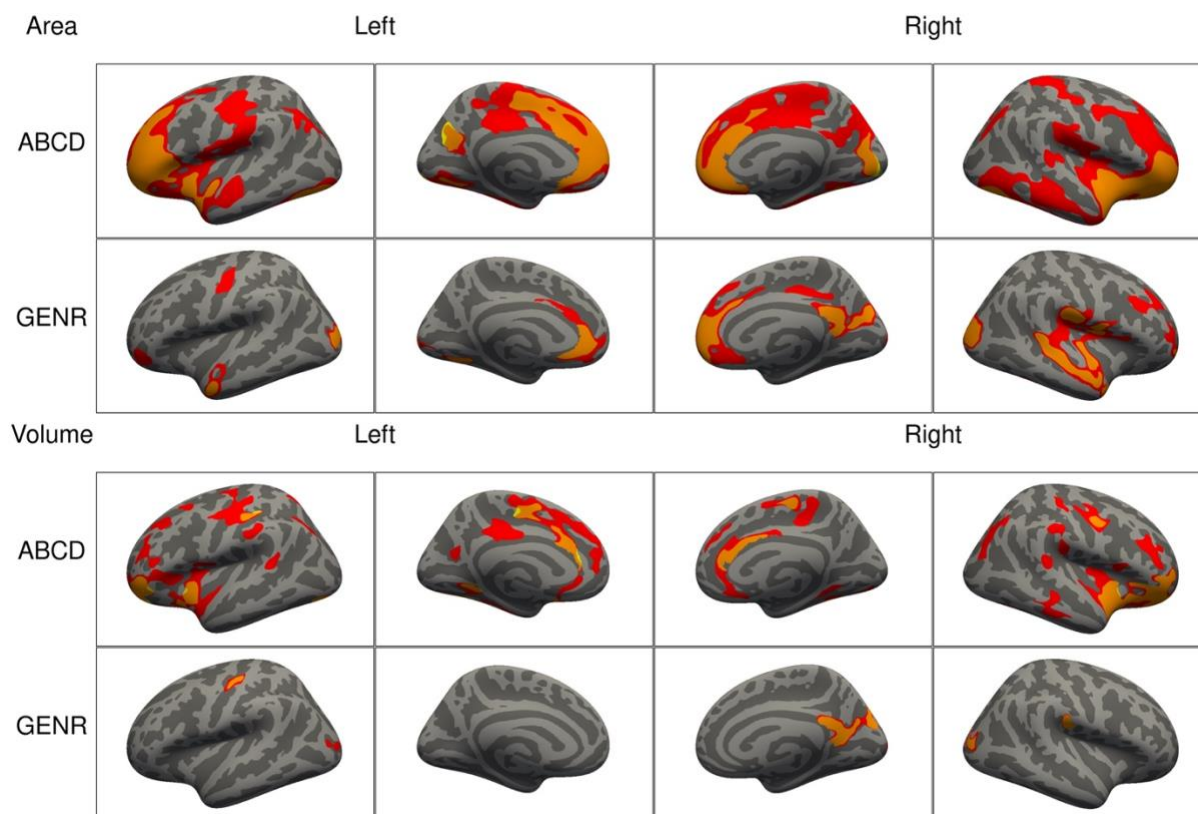

217  
218 *Note.* Rows represent the results for the ABCD or Generation R Studies, and the columns represent the left and right  
219 hemispheres. The colors denote the different models, with red vertices being significant only in model 3, orange ones in both  
220 model 3 and after adjustment for IQ, and yellow ones only after adjusting for IQ.

221

## 222 **Discussion**

223 By leveraging two large population-based studies and adopting a literature- and  
224 DAG-informed approach to address confounding, we showed that (i) associations between  
225 brain structure and ADHD symptoms, which were initially widespread, reduced when  
226 adjusting for socioeconomic and maternal behavioral confounders, and that (ii) careful  
227 considerations are needed when including IQ due to its unclear relation with ADHD and  
228 brain morphology.

229

## 230 **Adjustments for confounders highlighted key regions of association, observed across** 231 **two large cohorts**

232 Widespread associations between surface area and volume with ADHD symptoms  
233 were initially identified, with higher symptoms relating to smaller brain structures, in line with  
234 previous research (4,28). After adjustments for potential confounders typically overlooked by  
235 previous literature (socioeconomic and maternal behavioral factors), approximately half of  
236 the associations remained, and considerable effect size changes were observed in both the  
237 ABCD and Generation R Studies. We observed similar patterns of cluster reductions for the  
238 relation of ADHD diagnosis with surface area and volume in the ABCD Study.

239 Regions that remained associated after adjustments and which were consistently  
240 identified across cohorts were the precuneus, isthmus of the cingulate, supramarginal, pre-  
241 and post-central, and inferior parietal cortices for both area and volume. Most of these  
242 regions (e.g., supramarginal) have been previously implicated in ADHD in clinical samples  
243 (29–31). However, many different brain areas have been detected in association with the  
244 disorder (11), which may have hampered prior meta-analytic efforts to identify consistent  
245 neuroanatomical correlates for ADHD.

246 Here, we discerned associated areas likely subject to confounding bias from areas  
247 robust to socioeconomic and maternal behavioral factors, and replicable across two large  
248 cohorts. Comparisons with prior findings should be made with caution due to differences in

249 study design, samples (clinical vs. population-based), and analytical methods. Importantly,  
250 we highlighted the opportunity for future studies to include covariates that go beyond age  
251 and sex, can help refine associations, and can be readily collected. Future studies may want  
252 to consider other confounding factors, depending on their research question, design, and  
253 assumed causal relations.

254

### 255 **Adjustments for IQ are often unnecessary when examining the relation between brain** 256 **structure and ADHD**

257         Avoiding bias from adjusting for variables that are not confounders is as important as  
258 identifying sources of confounding. Adjusting for mediators or colliders of the ADHD-brain  
259 structure relation would induce bias. Here, when adjusting for IQ, which plays an unclear role  
260 in brain structure – ADHD associations, cluster sizes reduced considerably in both the ABCD  
261 and Generation R Studies. This could indicate that IQ is a confounder, in which case  
262 adjustments would be necessary, or that IQ is a mediator or collider, in which case  
263 adjustments must be avoided.

264         First, based on previous literature and this study, the association between ADHD and  
265 IQ is relatively weak (14) ( $r_{\text{ABCD}} = -0.11$ ,  $r_{\text{GENR}} = -0.14$ ), but this does not necessarily make it a  
266 weak confounder as the strength of confounding is due to a variable's relation with the  
267 exposure *and* outcome. Second, if brain structure and ADHD symptoms both cause  
268 cognitive changes, adjusting for IQ could induce collider bias, although this is also  
269 dependent on when IQ is measured relative to the exposure and outcome (8). Third, if brain  
270 structure determines cognitive functioning, which in turn affects ADHD symptoms (mediation  
271 by IQ), adjustments would also induce bias (26).

272         Given these scenarios, we recommend moving away from routinely adjusting for IQ  
273 in ADHD neuroimaging studies, and we highlight the need to carefully consider the causal  
274 model for a specific research question to determine whether IQ may confound associations.

275

276

277 **Generalization to psychiatric neuroimaging studies**

278 Our considerations on confounding likely generalize to the psychiatric neuroimaging  
279 field, as several confounders considered here (e.g., SES) also relate to brain function and  
280 other psychiatric disorders (32–34). Similarly, other psychiatric disorders are also  
281 characterized by complex relations with IQ (35).

282 Confounding control is paramount to studies examining determinants of a phenotype,  
283 like ADHD. However, even in these studies, one may be tempted to conduct correlational  
284 research with limited confounding adjustments, and then speculate about biological causal  
285 mechanisms (36,37). Rather, we suggest leveraging prior literature and expert knowledge to  
286 identify and adjust for key confounders. This can help eliminate the influence of alternative  
287 mechanisms (to the ones hypothesized) on the relation of interest (8). Charting the assumed  
288 (causal) structures to identify confounders can be done through the use of tools such as  
289 DAGs (8). Naturally, the plausibility of such assumptions should be evaluated. To facilitate  
290 the minimization of confounding bias in psychiatric neuroimaging, we propose a workflow in  
291 **Figure 7.**

## Minimizing confounding bias

*A workflow*

### When and Why

Careful confounder adjustments are paramount in studies with an etiological aim. Identify key potential confounders as early as possible and ideally before data collection. Incorporate in your study analysis techniques minimizing confounding bias (e.g. matching, adjustments)

Using models including question- and design-specific confounders minimizes incorrectly classifying effects due to confounding bias as real brain-behavior relations

### Consider multiple DAGs

Where a variable may have an unclear role in the association you are examining, consider multiple DAGs with different assumptions (e.g. IQ for ADHD and the brain as confounder, collider, mediator). Of note, running multiple models will *not* inform on the role of a variable and none of the assumed models may be correct, but subject-matter knowledge and previous literature can be used to identify likely scenarios.

### Interpretation

Interpret the results in light of the DAG-informed models you previously specified. When interpreting the findings, it is key to evaluate the extent to which you think your DAG model assumptions are met.

### Using and building DAGs

DAGs can be useful to represent research questions and identify confounders, colliders, and mediators. DAGs can therefore guide on which variables should be adjusted for.

Information from previous literature and subject-matter knowledge can be used to guide in building a DAG. Search for information on variables which may affect both the predictor and outcome and make sure to follow DAG rules.

### Consider unmeasured or residual confounding

Discuss the potential biases that may arise from variables not captured in the data (unmeasured confounding) and from measurement error in confounders (residual confounding). Consider sensitivity analyses (e.g. bounding factor, simulations) to quantify these.

## 294 **Limitations of the present study and suggestions for future research**

295           Despite leveraging two large samples with similar characteristics and assessments,  
296 this study presents several limitations. First, there is always potential for residual  
297 confounding through unmeasured confounders and misclassification of measured  
298 confounders. For example, given that genetic factors influence both ADHD and brain  
299 morphology and that there is a genetic correlation between ADHD risk and intracranial  
300 volume (38–40), certain genetic risk variants may be unmeasured confounders. However,  
301 we aimed to illustrate plausible confounding bias scenarios for ADHD and brain structure,  
302 and not to provide an exhaustive list of potential confounders, which may vary depending on  
303 the study population and research question. Future studies should also consider bias  
304 analyses to assess the impact that residual confounding may have on the study results (41).  
305 Bias analyses can help understand the minimum association strength an unmeasured  
306 confounder needs to have with the determinant and outcome to fully explain away the  
307 findings (42). Developments may be needed, however, for their adaptation to the  
308 neuroimaging field.

309           Second, due to our cross-sectional design, deliberately chosen to correspond to most  
310 neuroimaging studies, we must assume all confounders precede our determinant and  
311 outcome. This is a plausible assumption for the Generation R Study as, being a prospective  
312 birth cohort, we could ensure that the confounders here considered temporally preceded  
313 both ADHD and neuroanatomical assessments. However, this was not possible for the  
314 ABCD Study, which started sampling at child ages 9-10 years. Future research on the  
315 temporal relations between potential confounders, ADHD, and brain structure will aid the  
316 minimization of confounding bias when investigating the structural substrates of ADHD.

317           Third, neuroimaging parameters, such as head motion, were not considered here  
318 because they are discussed elsewhere (43), and generally fall under measurement error  
319 (information bias) rather than confounding bias. For instance, even when children with  
320 ADHD move more in the scanner compared to controls, determining lower image quality,  
321 head motion during scanning cannot cause changes in ADHD symptom levels. Future

322 research aiming to increase precision in their estimates may, however, benefit from  
323 adjustments for this and other neuroimaging parameters.

324         Lastly, while we leveraged both symptom-level and diagnostic data for ADHD, this  
325 was done within population-based studies. Our results cannot, therefore, be generalized to a  
326 clinical population. Future research could examine the extent to which associations between  
327 brain structure and ADHD change after adjustments for likely confounders in clinical  
328 samples.

329         In conclusion, leveraging an empirical example from two large studies on  
330 neuroanatomy and ADHD symptoms, we highlighted the opportunity for future studies to  
331 consider further key confounders. These can be identified based on prior literature and  
332 causal diagrams as well as be readily collected, offering a feasible venue for future research.  
333 Adjusting for these potential confounders helped identify more refined cortical associations  
334 with ADHD symptoms, robust to the influence of demographic and socioeconomic factors,  
335 pregnancy exposures, and maternal psychopathology. We also evaluated the potential role  
336 of IQ, which could be a mediator, collider, and/or confounder. While adjusting for IQ led to  
337 reductions in associations, these would, however, likely not be attributable to reduced  
338 confounding bias. We discussed the generalizability of these considerations on confounding  
339 bias to psychiatric neuroimaging, and suggest a workflow that can be followed to minimize  
340 confounding bias in future studies.

## 341 **Methods and Materials**

### 342 **Participants**

343 We analyzed data from two independent population-based cohorts: The ABCD study  
344 and the Generation R Study. The ABCD study is conducted across 21 study sites in the US  
345 and recruited since 2015 children aged 9 to 10 at baseline (44). The Generation R Study is  
346 based in Rotterdam, the Netherlands, with data collection spanning from fetal life until early  
347 adulthood, and started in 2002 (16). Details of the sampling rationale, recruitment, methods,  
348 and procedures have been described elsewhere (16,44). Research protocols for the ABCD  
349 study were approved by the institutional review board of the University of California, San  
350 Diego, and the institutional review boards of the 21 data collection sites, while the design of  
351 the Generation R study was approved by the Medical Ethics Committee of the Erasmus MC.  
352 For both studies, written informed consent and assent from the primary caregiver or child  
353 were obtained.

354 In this cross-sectional study, we leveraged data from the baseline assessment of the  
355 ABCD study (release 2.0.1) and the 10-year assessment of the Generation R study. Both  
356 waves included behavioral and neuroimaging measures. We included children with data on  
357 ADHD symptoms and T<sub>1</sub>-weighted MRI images. Participants were excluded if (i) they had  
358 dental braces, (ii) incidental findings, (iii) their brain scans failed processing or quality  
359 assurance procedures, or (iv) they were twins or triplets. Of note, excluding children with  
360 dental braces is unlikely to determine selection bias by SES in either the ABCD or the  
361 Generation R study as the former cohort covered the costs of dental braces removal for all  
362 children who enrolled, while dental care is insured for all children in the Netherlands. Within  
363 the Generation R study, a small set of participants were additionally excluded because they  
364 had a different scan sequence. Finally, for each non-twin sibling set, one was randomly  
365 included to minimize shared method variance bias. Flowcharts for participant inclusion and



366 exclusion are available in **Supplementary Figure 9**. The final samples consisted of 7,961  
367 and 2,531 children from the ABCD and Generation R studies, respectively.

368

## 369 **Measures**

### 370 *ADHD symptoms*

371 Children's ADHD symptoms, reported by the primary caregiver, were measured with  
372 the CBCL (school-age version) (45), an inventory widely used for parent reports of children's  
373 emotional and behavioral problems. The attention problem syndrome scale (20 items)  
374 measures inattention, hyperactivity, and impulsivity and has been previously shown to have  
375 clinical utility and to discriminate between ADHD cases and controls (46). Attention problems  
376 were analyzed on a discrete scale (range 0-19). For the ABCD study, we repeated the  
377 analysis using present ADHD diagnosis from a parent-reported and computerized version of  
378 the KSADS-5. This is a dimensional and categorical assessment used to diagnose current  
379 and past psychiatric disorders according to the Diagnostic and Statistical Manual of Mental  
380 Disorders (Fifth Edition) (47,48).

381

### 382 *Image acquisition*

383 T<sub>1</sub>-weighted data were obtained on multiple 3T scanners in the ABCD study  
384 (Siemens Prisma, General Electric (GE) 750 and Philips) and one scanner in the Generation  
385 R study (GE MR750w). Standard adult-sized coils were used for the ABCD study and an  
386 eight-channel receive-only head coil for the Generation R study. To acquire T<sub>1</sub>-weighted  
387 structural images, the ABCD study used an inversion prepared RF-spoiled gradient echo  
388 scan with prospective motion correction while the Generation R study used an inversion  
389 recovery fast spoiled gradient recalled sequence (GE option = BRAVO, TR = 8.77 ms, TE =  
390 3.4 ms, TI = 600 ms, flip angle = 10°, matrix size = 220 × 220, field of view = 220 mm × 220  
391 mm, slice thickness = 1 mm, number of slices = 230, ARC acceleration factor = 2). More  
392 details can be found elsewhere (15,49,50). Of note, in the ABCD study, a technical mistake

393 occurred at one collection site, causing the hemisphere data to be flipped. This was fixed  
394 before processing.

395

#### 396 *Image processing*

397 FreeSurfer (version 6.0.0) was used for image processing, which involved (i) removal  
398 of non-brain tissue, (ii) correction of voxel intensities for B<sub>1</sub> field inhomogeneities, (iii) tissue  
399 segmentation, and (iv) cortical surface-based reconstruction. Cortical surface maps were  
400 smoothed with a full width of a half-maximum Gaussian kernel of 10 mm. Within the ABCD  
401 Study, quality assessment was based on the quality control and recommended inclusion  
402 criteria for structural data from the ABCD team (49). Within the Generation R Study, quality  
403 assurance was manually performed by visually inspecting all images by trained raters, as  
404 previously described in the literature (51). Poor quality reconstructions were excluded.

405

#### 406 *Covariate assessment*

407 *The ABCD study.* All data were collected at baseline (child age 9 to 10-years). Age  
408 and sex were recorded at intake. Child race/ethnicity was reported by the primary caregiver  
409 and was categorized as White, Black, Hispanic, Asian, Other by the ABCD team. Household  
410 combined net income (<\$50,000, >=\$50,000 & < \$100,000, >=\$100,000) and highest  
411 maternal education (<high school, high school diploma/GED, some college, bachelor  
412 degree, postgraduate degree) were self-reported by the primary caregiver in the Parent  
413 Demographics Survey. Maternal age at childbirth was measured in the Developmental  
414 History Questionnaire. Tobacco and cannabis use during pregnancy were retrospectively  
415 reported by the mother (yes, no, I do not know) in the Developmental History Questionnaire.  
416 Caregiver psychopathology was obtained from the Total Problems Adult Self Report  
417 Syndrome Scale. The Wechsler Intelligence Scale for Children-6 Matrix Reasoning total  
418 scaled score was used as a proxy for IQ.

419 *The Generation R study.* Age and sex were measured based on medical records  
420 obtained at birth. Child ethnicity (western, non-western) was assessed based on the parents'

421 birth country, in line with the Statistics Netherlands bureau. Maternal age at childbirth was  
422 prospectively measured. Family income and highest maternal education were obtained  
423 through prospective self-reports by the mother and/or father at child age 5 years. Maternal  
424 education was coded into low (no/primary education), intermediate (secondary school,  
425 vocational training), and high (Bachelor's degree/University). Household net monthly income  
426 was classified as low (< 2000 euros), middle (2,000-3,200 euros), and high (> 3,200 euros).  
427 Maternal postnatal psychopathology, measured at child age six months, was prospectively  
428 reported by the mother based on the Brief Symptom Inventory questionnaire global severity  
429 index. Mothers prospectively reported smoking (never used, used) and cannabis use during  
430 pregnancy (no use vs. use during pregnancy). Non-verbal child IQ was measured at child  
431 age five years, based on the Snijders-Oomen Niet-Verbale Intelligentie Test (52), a validated  
432 Dutch non-verbal intelligence test.

433

#### 434 *Covariate selection*

435 Similar covariates were grouped into confounding sets to minimize the number of  
436 tested models while including relevant confounders. Factors included in model 1 related to  
437 demographic and study characteristics (age, sex, ethnicity, and study site). Age and sex  
438 were selected as these have been previously adjusted for in previous neuroimaging studies  
439 of ADHD (**Supplementary Table 1**). Ethnicity was used as a proxy for differential health risk  
440 exposure among people of different ethnic groups. The study site was incorporated to  
441 account for location and scanner differences in the ABCD study.

442 Further potential confounders were selected based on previous literature and with  
443 the aid of DAGs, as described in the *Results* section. In model 2, variables indicating  
444 socioeconomic factors were included (maternal education, household income, maternal age  
445 at childbirth). Household income and maternal education are generally considered to  
446 measure childhood SES in health research (53). Maternal age at childbirth can additionally  
447 inform on the SES of the child by capturing part of the variance unexplained by income and  
448 education (e.g., younger mothers facing higher occupational challenges, highly educated

449 mothers delaying childbirth (54)). In model 3, maternal factors from the prenatal and  
450 postnatal period were grouped (tobacco and cannabis use during pregnancy and maternal  
451 psychopathology) to measure early life exposures which may impact a child's brain and  
452 psychiatric development.

453

## 454 **Statistical Analyses**

455 The R statistical software (version 3.4.3) was used for all analyses. Missing data on  
456 covariates were imputed with chained equations using the *mice* R package (55). Linear  
457 vertex-wise analyses were performed with the *QDECOR* R package (56), with surface  
458 area/volume and ADHD symptoms as variables of interest. Thickness was not examined due  
459 to previously reported null findings in the Generation R study (4), and because it adds little  
460 information on top of surface area and volume. Correction for multiple testing was applied by  
461 using cluster-wise corrections based on Monte Carlo simulations with a cluster forming  
462 threshold of 0.001, which yields false-positive rates similar to full permutation testing (57). A  
463 Bonferroni correction was applied to adjust for analyzing both hemispheres separately (i.e.,  $p$   
464  $< 0.025$  cluster-wise).

465 Our analyses for aim 1 involved three vertex-wise linear regression models, which  
466 progressively expanded to adjust for additional confounding factors. The first model focused  
467 on demographic covariates, the second on socioeconomic ones, and the third on maternal  
468 behavioral variables related to psychopathology and pregnancy exposures. These models  
469 were run for ADHD symptoms (in both the ABCD and Generation R studies) and ADHD  
470 diagnosis (in the ABCD study only, as sensitivity analysis). One additional model, building  
471 upon model 3, was run to address aim 2, to illustrate the consequences of adjusting for IQ.  
472 Given that IQ and ADHD were weakly correlated ( $r_{ABCD} = -0.11$ ,  $r_{GENR} = -0.14$ ),  
473 multicollinearity was not expected.

## ACKNOWLEDGEMENTS

The ABCD Study is supported by the National Institutes of Health and additional federal partners under award numbers U01DA041048, U01DA050989, U01DA051016, U01DA041022, U01DA051018, U01DA051037, U01DA050987, U01DA041174, U01DA041106, U01DA041117, U01DA041028, U01DA041134, U01DA050988, U01DA051039, U01DA041156, U01DA041025, U01DA041120, U01DA051038, U01DA041148, U01DA041093, U01DA041089, U24DA041123, U24DA041147. All supporters are mentioned at <https://abcdstudy.org/federal-partners.html>. Participating sites and study investigators are shown at [https://abcdstudy.org/consortium\\_members/](https://abcdstudy.org/consortium_members/). While ABCD investigators designed, implemented the study, and/or provided data, they did not participate in this manuscript. This work reflects the authors' views, and may not reflect those of the NIH or ABCD investigators. The Generation R Study is supported by Erasmus MC, Erasmus University Rotterdam, the Rotterdam Homecare Foundation, the Municipal Health Service Rotterdam area, the Stichting Trombosedienst & Artsenlaboratorium Rijnmond, the Netherlands Organization for Health Research and Development (ZonMw), and the Ministry of Health, Welfare and Sport. Neuroimaging data acquisition was funded by the European Community's 7th Framework Program (FP7/2008-2013, 212652, Nutrimenthe). Netherlands Organization for Scientific Research (Exacte Wetenschappen) and SURFsara (Cartesius Compute Cluster, [www.surfsara.nl](http://www.surfsara.nl)) supported the Supercomputing resources. Authors are supported by an NWO-VICI grant (NWO-ZonMW: 016.VICI.170.200 to HT) for HT, LDA, SL, and the Sophia Foundation S18-20, and Erasmus University and Erasmus MC Fellowship for RLM. We thank the participants, general practitioners, hospitals, midwives, and pharmacies in Rotterdam who contributed to the study.

## DISCLOSURES

We declare no conflicts of interest.

## REFERENCES

1. American Psychiatric Association (2013): *Diagnostic and Statistical Manual of Mental Disorders (5th Ed.)*.
2. Nakao T, Radua J, Rubia K, Mataix-Cols D (2011): Gray Matter Volume Abnormalities in ADHD: Voxel-Based Meta-Analysis Exploring the Effects of Age and Stimulant Medication. *Am J Psychiatry* 168: 1154–63.
3. Hoogman M, Bralten J, Hibar DP, Mennes M, Zwiers MP, Schweren LSJ, *et al.* (2017): Subcortical brain volume differences in participants with attention deficit hyperactivity disorder in children and adults: a cross-sectional mega-analysis. *Lancet Psychiatry* 4. [https://doi.org/10.1016/S2215-0366\(17\)30049-4](https://doi.org/10.1016/S2215-0366(17)30049-4)
4. Hoogman M, Muetzel R, Guimaraes JP, Shumskaya E, Mennes M, Zwiers MP, *et al.* (2019): Brain Imaging of the Cortex in ADHD: A Coordinated Analysis of Large-Scale Clinical and Population-Based Samples. *Am J Psychiatry* 176: 531–542.
5. Shaw P, Malek M, Watson B, Greenstein D, de Rossi P, Sharp W (2018): Trajectories of Cerebral Cortical Development in Childhood and Adolescence and Adult Attention-Deficit/Hyperactivity Disorder. *Biol Psychiatry* 74: 599–606.
6. Samea F, Soluki S, Nejati V, Zarei M, Cortese S, Eickhoff SB, *et al.* (2019): Brain alterations in children/adolescents with ADHD revisited: A neuroimaging meta-analysis of 96 structural and functional studies. *Neurosci Biobehav Rev* 100: 1–8.
7. VanderWeele TJ (2019): Principles of confounder selection. *Eur J Epidemiol* 34: 211–219.
8. Hernan MA, Robins JM (2020): *Causal Inference What If?* CRC press Taylor & Francis Group.

9. Mous S, Muetzel R, El Marroun H, Polderman T, Lugt A, Jaddoe V, *et al.* (2014): Cortical thickness and inattention/hyperactivity symptoms in young children: A population-based study. *Psychol Med* 44: 1–11.
10. Bernanke J, Luna A, Chang L, Bruno E, Dworkin J, Posner J (2022): Structural brain measures among children with and without ADHD in the Adolescent Brain and Cognitive Development Study cohort: a cross-sectional US population-based study. *Lancet Psychiatry* 0. [https://doi.org/10.1016/S2215-0366\(21\)00505-8](https://doi.org/10.1016/S2215-0366(21)00505-8)
11. Saad JF, Griffiths KR, Korgaonkar MS (2020): A Systematic Review of Imaging Studies in the Combined and Inattentive Subtypes of Attention Deficit Hyperactivity Disorder. *Front Integr Neurosci* 14: 31.
12. Russell AE, Ford T, Williams R, Russell G (2016): The Association Between Socioeconomic Disadvantage and Attention Deficit/Hyperactivity Disorder (ADHD): A Systematic Review. *Child Psychiatry Hum Dev* 47: 440–458.
13. Noble KG, Houston SM, Brito NH, Bartsch H, Kan E, Kuperman JM, *et al.* (2015): Family income, parental education and brain structure in children and adolescents. *Nat Neurosci* 18: 773–778.
14. Dennis M, Francis DJ, Cirino PT, Schachar R, Barnes MA, Fletcher JM (2009): Why IQ is not a covariate in cognitive studies of neurodevelopmental disorders. *J Int Neuropsychol Soc JINS* 15: 331–343.
15. Casey BJ, Cannonier T, Conley MI, Cohen AO, Barch DM, Heitzeg MM, *et al.* (2018): The Adolescent Brain Cognitive Development (ABCD) study: Imaging acquisition across 21 sites. *Dev Cogn Neurosci* 32: 43–54.

16. Kooijman MN, Kruithof CJ, van Duijn CM, Duijts L, Franco OH, van IJzendoorn MH, *et al.* (2016): The Generation R Study: design and cohort update 2017. *Eur J Epidemiol* 31: 1243–1264.
17. Lee PH (2014): Should we adjust for a confounder if empirical and theoretical criteria yield contradictory results? A simulation study. *Sci Rep* 4: 6085.
18. Eilertsen EM, Gjerde LC, Reichborn-Kjennerud T, Ørstavik RE, Knudsen GP, Stoltenberg C, *et al.* (2017): Maternal alcohol use during pregnancy and offspring attention-deficit hyperactivity disorder (ADHD): a prospective sibling control study. *Int J Epidemiol* 46: 1633–1640.
19. Lees B, Mewton L, Jacobus J, Valadez EA, Stapinski LA, Teesson M, *et al.* (2020): Association of Prenatal Alcohol Exposure With Psychological, Behavioral, and Neurodevelopmental Outcomes in Children From the Adolescent Brain Cognitive Development Study. *Am J Psychiatry* 177: 1060–1072.
20. Clavarino AM, Mamun AA, O’Callaghan M, Aird R, Bor W, O’Callaghan F, *et al.* (2010): Maternal Anxiety and Attention Problems in Children at 5 and 14 Years [no. 6]. *J Atten Disord* 13: 658–667.
21. Zou R, Tiemeier H, van der Ende J, Verhulst FC, Muetzel RL, White T, *et al.* (2019): Exposure to Maternal Depressive Symptoms in Fetal Life or Childhood and Offspring Brain Development: A Population-Based Imaging Study. *Am J Psychiatry* 176: 702–710.
22. Bridgett DJ, Walker ME (2006): Intellectual functioning in adults with ADHD: A meta-analytic examination of full scale IQ differences between adults with and without ADHD. *Psychol Assess* 18: 1–14.



23. McDaniel MA (2005): Big-brained people are smarter: A meta-analysis of the relationship between in vivo brain volume and intelligence. *Intelligence* 33: 337–346.
24. Gallo EF, Posner J (2016): Moving towards causality in attention-deficit hyperactivity disorder: overview of neural and genetic mechanisms. *Lancet Psychiatry* 3: 555–567.
25. Lee JJ, McGue M, Iacono WG, Michael AM, Chabris CF (2019): The causal influence of brain size on human intelligence: Evidence from within-family phenotypic associations and GWAS modeling. *Intelligence* 75: 48–58.
26. VanderWeele TJ (2016): Mediation Analysis: A Practitioner's Guide. *Annu Rev Public Health* 37: 17–32.
27. Jepsen JRM, Fagerlund B, Mortensen EL (2009): Do Attention Deficits Influence IQ Assessment in Children and Adolescents With ADHD? *J Atten Disord* 12: 551–562.
28. Gehricke J-G, Kruggel F, Thampipop T, Alejo SD, Tatos E, Fallon J, Muftuler LT (2017): The brain anatomy of attention-deficit/hyperactivity disorder in young adults – a magnetic resonance imaging study. *PLOS ONE* 12: e0175433.
29. Saad JF, Griffiths KR, Kohn MR, Clarke S, Williams LM, Korgaonkar MS (2017): Regional brain network organization distinguishes the combined and inattentive subtypes of Attention Deficit Hyperactivity Disorder. *NeuroImage Clin* 15: 383–390.
30. Lei D, Ma J, Du X, Shen G, Jin X, Gong Q (2014): Microstructural Abnormalities in the Combined and Inattentive Subtypes of Attention Deficit Hyperactivity Disorder: a Diffusion Tensor Imaging Study. *Sci Rep* 4: 6875.
31. Solanto MV, Pope-Boyd SA, Tryon WW, Stepak B (2009): Social Functioning in Predominantly Inattentive and Combined Subtypes of Children With ADHD. *J Atten Disord* 13: 27–35.

32. Biazoli CE, Salum GA, Gadelha A, Rebello K, Moura LM, Pan PM, *et al.* (2020): Socioeconomic status in children is associated with spontaneous activity in right superior temporal gyrus. *Brain Imaging Behav* 14: 961–970.
33. Kivimäki M, Batty GD, Pentti J, Shipley MJ, Sipilä PN, Nyberg ST, *et al.* (2020): Association between socioeconomic status and the development of mental and physical health conditions in adulthood: a multi-cohort study. *Lancet Public Health* 5: e140–e149.
34. Apter G, Bobin A, Genet M-C, Gratier M, Devouche E (2017): Update on Mental Health of Infants and Children of Parents Affected With Mental Health Issues. *Curr Psychiatry Rep* 19: 72.
35. Der G, Batty GD, Deary IJ (2009): The association between IQ in adolescence and a range of health outcomes at 40 in the 1979 US National Longitudinal Study of Youth. *Intelligence* 37: 573–580.
36. Hernán MA (2018): The C-Word: Scientific Euphemisms Do Not Improve Causal Inference From Observational Data. *Am J Public Health* 108: 616–619.
37. Grosz MP, Rohrer JM, Thoemmes F (2020): The Taboo Against Explicit Causal Inference in Nonexperimental Psychology. *Perspect Psychol Sci* 15: 1243–1255.
38. Jansen AG, Mous SE, White T, Posthuma D, Polderman TJC (2015): What Twin Studies Tell Us About the Heritability of Brain Development, Morphology, and Function: A Review [no. 1]. *Neuropsychol Rev* 25: 27–46.
39. Klein M, Walters RK, Demontis D, Stein JL, Hibar DP, Adams HH, *et al.* (2019): Genetic Markers of ADHD-Related Variations in Intracranial Volume. *Am J Psychiatry* 176: 228–238.

40. Klein M, Onnink M, van Donkelaar M, Wolfers T, Harich B, Shi Y, *et al.* (2017): Brain imaging genetics in ADHD and beyond – Mapping pathways from gene to disorder at different levels of complexity. *Neurosci Biobehav Rev* 80: 115–155.
41. Lash T, Fox M, MacLehose R (2021): *Applying Quantitative Bias Analysis to Epidemiologic Data*. Springer International Publishing. Retrieved February 16, 2022, from <https://link.springer.com/book/9783030826727>
42. VanderWeele TJ, Ding P (2017): Sensitivity Analysis in Observational Research: Introducing the E-Value. *Ann Intern Med* 167: 268–274.
43. Alfaro-Almagro F, McCarthy P, Afyouni S, Andersson JLR, Bastiani M, Miller KL, *et al.* (2021): Confound modelling in UK Biobank brain imaging. *NeuroImage* 224: 117002.
44. Garavan H, Bartsch H, Conway K, Decastro A, Goldstein RZ, Heeringa S, *et al.* (2018): Recruiting the ABCD sample: Design considerations and procedures. *Dev Cogn Neurosci* 32: 16–22.
45. Achenbach, Rescorla (2001): *Manual for the ASEBA School-Age Forms and Profiles*. Burlington: University of Vermont, Research Center for Children, Youth, and Families.
46. Eiraldi RB, Power TJ, Karustis JL, Goldstein SG (2000): Assessing ADHD and Comorbid Disorders in Children: The Child Behavior Checklist and the Devereux Scales of Mental Disorders. *J Clin Child Psychol* 29: 3–16.
47. Kaufman J, Birmaher B, Brent D, Rao U, Flynn C, Moreci P, *et al.* (1997): Schedule for Affective Disorders and Schizophrenia for School-Age Children-Present and Lifetime Version (K-SADS-PL): initial reliability and validity data. *J Am Acad Child Adolesc Psychiatry* 36: 980–988.

48. Kobak KA (2020): *Computerized Screening for Comorbidity in Adolescents With Substance or Psychiatric Disorders*. *clinicaltrials.gov*. Retrieved January 13, 2022, from <https://clinicaltrials.gov/ct2/show/NCT01866956>
49. Hagler DJ, Hatton SeanN, Cornejo MD, Makowski C, Fair DA, Dick AS, *et al.* (2019): Image processing and analysis methods for the Adolescent Brain Cognitive Development Study. *NeuroImage* 202: 116091.
50. White T, Muetzel RL, El Marroun H, Blanken LME, Jansen P, Bolhuis K, *et al.* (2018): Paediatric population neuroimaging and the Generation R Study: the second wave. *Eur J Epidemiol* 33: 99–125.
51. Muetzel RL, Mulder RH, Lamballais S, Cortes Hidalgo AP, Jansen P, Güroğlu B, *et al.* (2019): Frequent Bullying Involvement and Brain Morphology in Children. *Front Psychiatry* 10. <https://doi.org/10.3389/fpsy.2019.00696>
52. Tellegen PJ, Laros JA (1998): Snijders-Oomen Niet-verbale Intelligentietest SON-R 2½ - 7. Retrieved June 28, 2021, from <https://research.rug.nl/en/publications/snijders-oomen-niet-verbale-intelligentietest-son-r-2-7>
53. Children, Youth, Families and Socioeconomic Status (n.d.): <https://www.apa.org>. Retrieved November 22, 2021, from <https://www.apa.org/pi/ses/resources/publications/children-families>
54. Heck KE, Schoendorf KC, Ventura SJ, Kiely JL (1997): Delayed Childbearing by Education Level in the United States, 1969–1994. *Matern Child Health J* 1: 81–88.
55. Buuren S van, Groothuis-Oudshoorn K (2011): mice: Multivariate Imputation by Chained Equations in R [no. 1]. *J Stat Softw* 45: 1–67.
56. Lamballais S, Muetzel RL (2021): QDECR: A Flexible, Extensible Vertex-Wise Analysis Framework in R. *Front Neuroinformatics* 15. <https://doi.org/10.3389/fninf.2021.561689>

57. Greve DN, Fischl B (2018): False Positive Rates in Surface-based Anatomical Analysis.

*NeuroImage* 171: 6–14.

## **STROBE Flowchart**

Flowcharts of participant inclusion and exclusion for ABCD (panel A) and Generation R

(panel B).

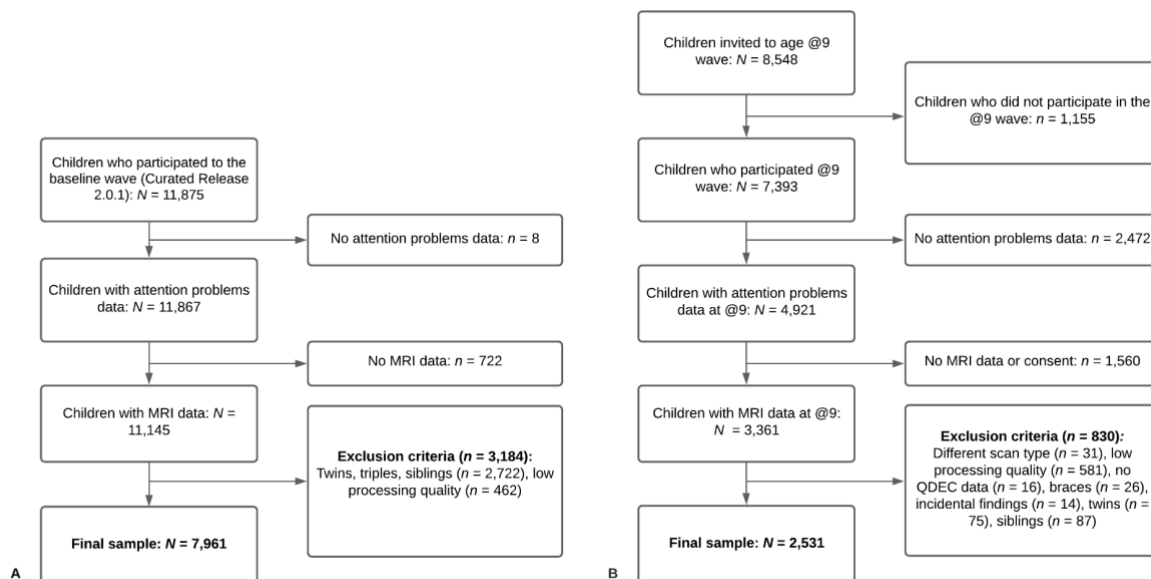

Source: https://medrxiv.org/content/medrxiv/early/2022/05/03/2022.05.03.22274414.full.pdf
